# Supplementary material for: Age, period and cohort effects and the predictors of physical activity and sedentary behaviour among Chinese children, from 2004 to 2011
Source: PubMed Central journal article supplement (PMC5402654; doi:10.1186/s12889-017-4215-x), 2017-04-24

Additional file 1: Figure S1. Secular trends in Sedentary Activity level among boys in CHNS by baseline age groups. Notes: Bars represent difference from baseline (2004) Sedentary Activity , estimated from longitudinal models, stratified by baseline age groups

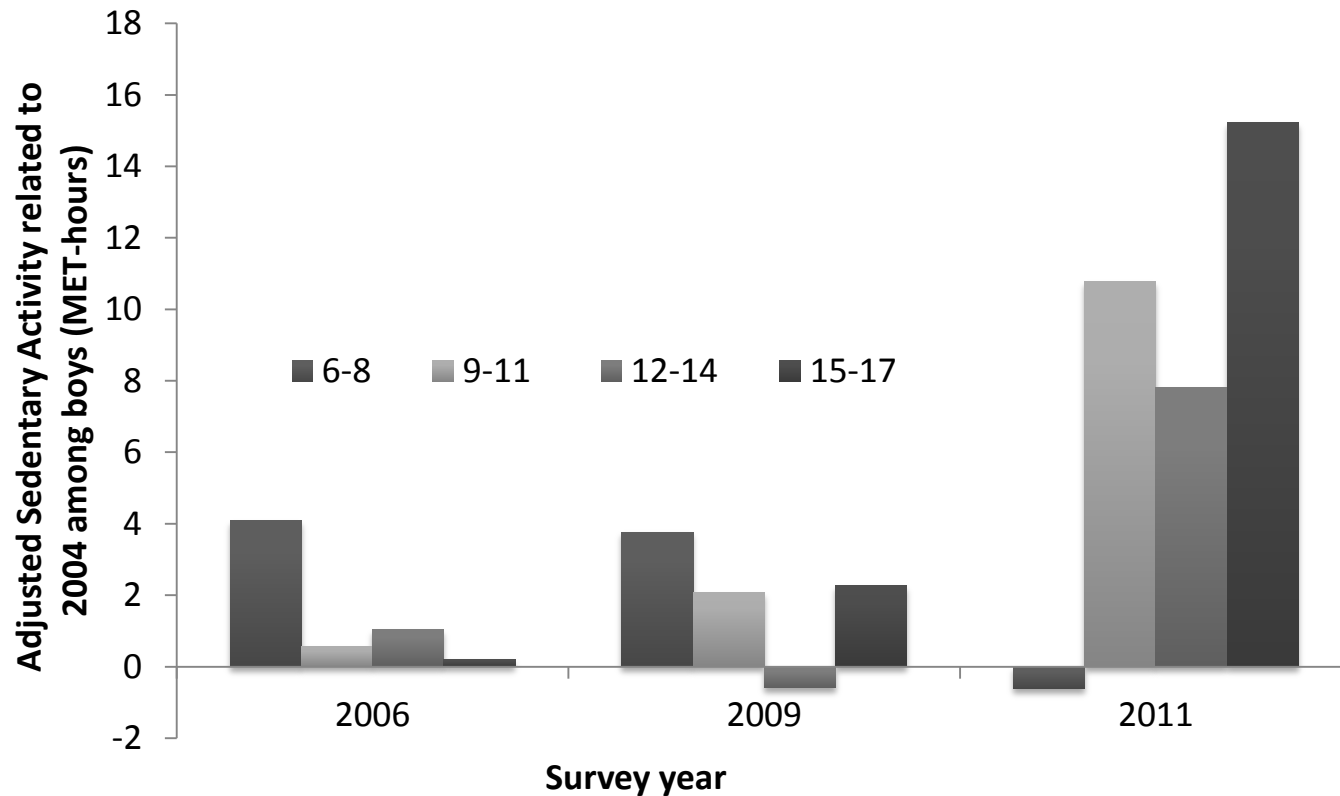

Supplement: 12889_2017_4215_MOESM1_ESM.pdf [file 12889_2017_4215_MOESM1_ESM.pdf]
